# Supplementary material for: SQSTM1/p62-Directed Metabolic Reprogramming Is Essential for Normal Neurodifferentiation
Source: PubMed Central journal article supplement — Stem Cell Reports. 2019 Feb 28;12(4):696–711. doi: 10.1016/j.stemcr.2019.01.023 (PMC6449840; doi:10.1016/j.stemcr.2019.01.023), 2019-02-28
Supplement: mmc1.pdf [file mmc1.pdf]

**Stem Cell Reports, Volume 12**

**Supplemental Information**

**SQSTM1/p62-Directed Metabolic Reprogramming Is Essential for Normal Neurodifferentiation**

**Javier Calvo-Garrido, Camilla Maffezzini, Florian A. Schober, Paula Clemente, Elias Uhlin, Malin Kele, Henrik Stranneheim, Nicole Lesko, Helene Bruhn, Per Svenningsson, Anna Falk, Anna Wedell, Christoph Freyer, and Anna Wredenberg**

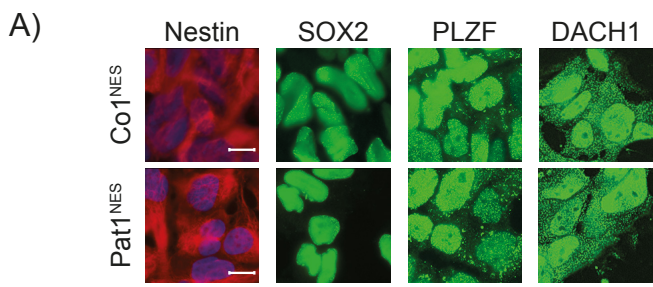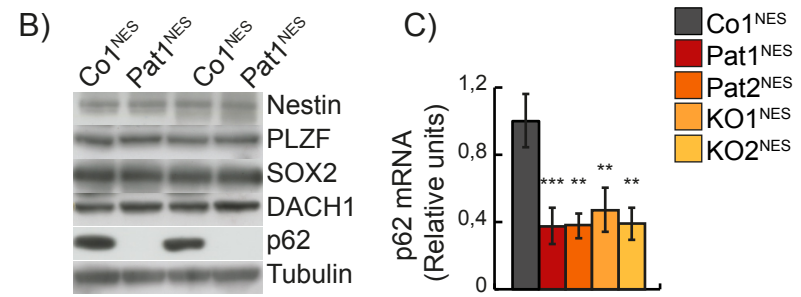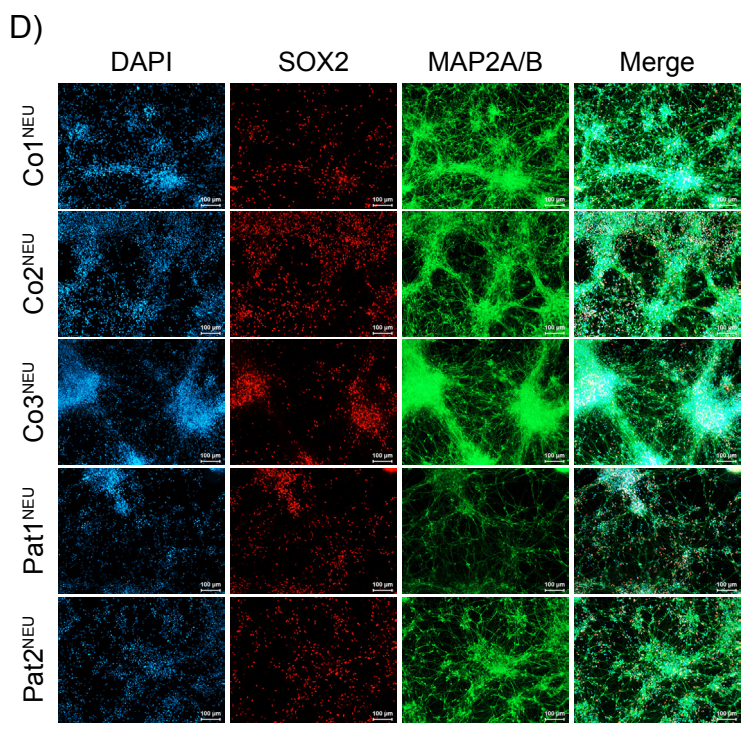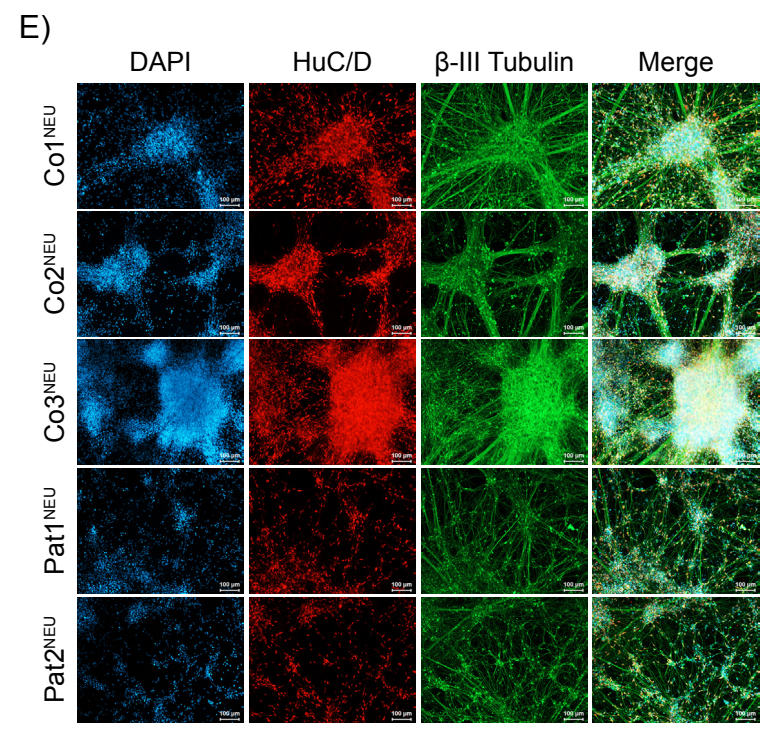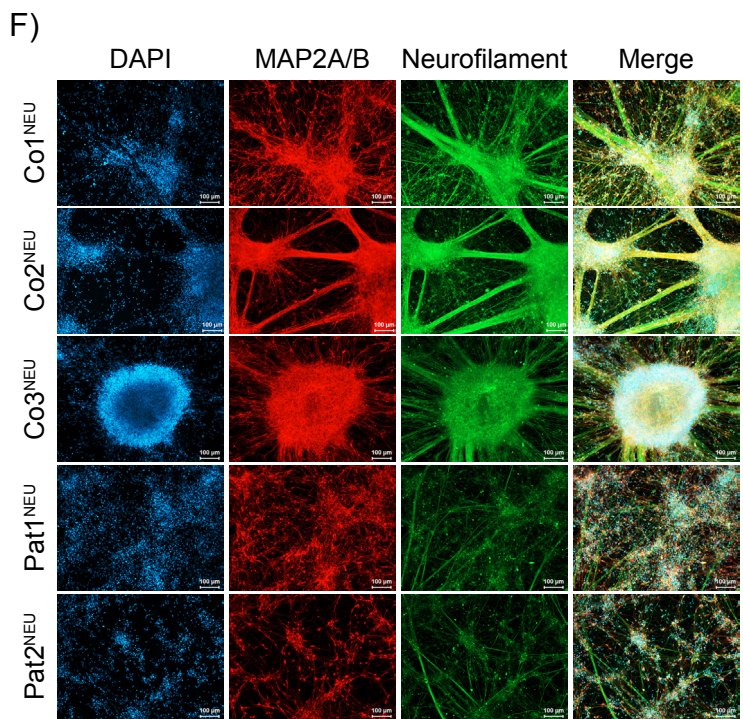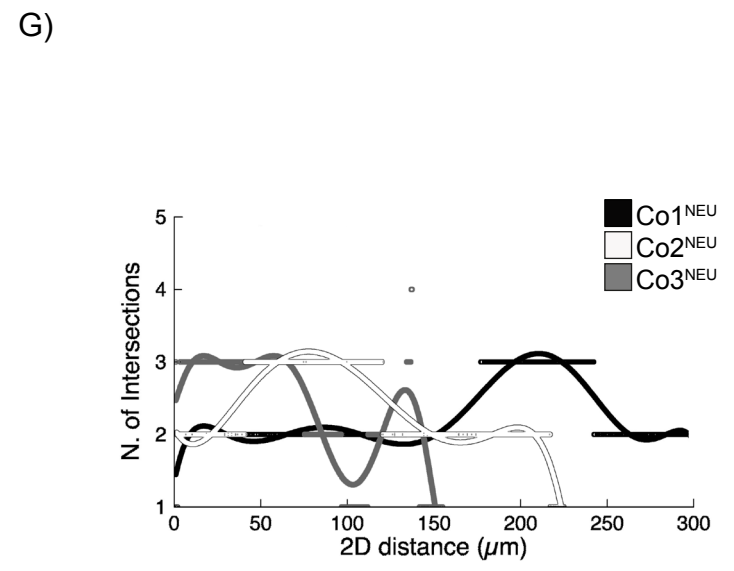

Figure S1

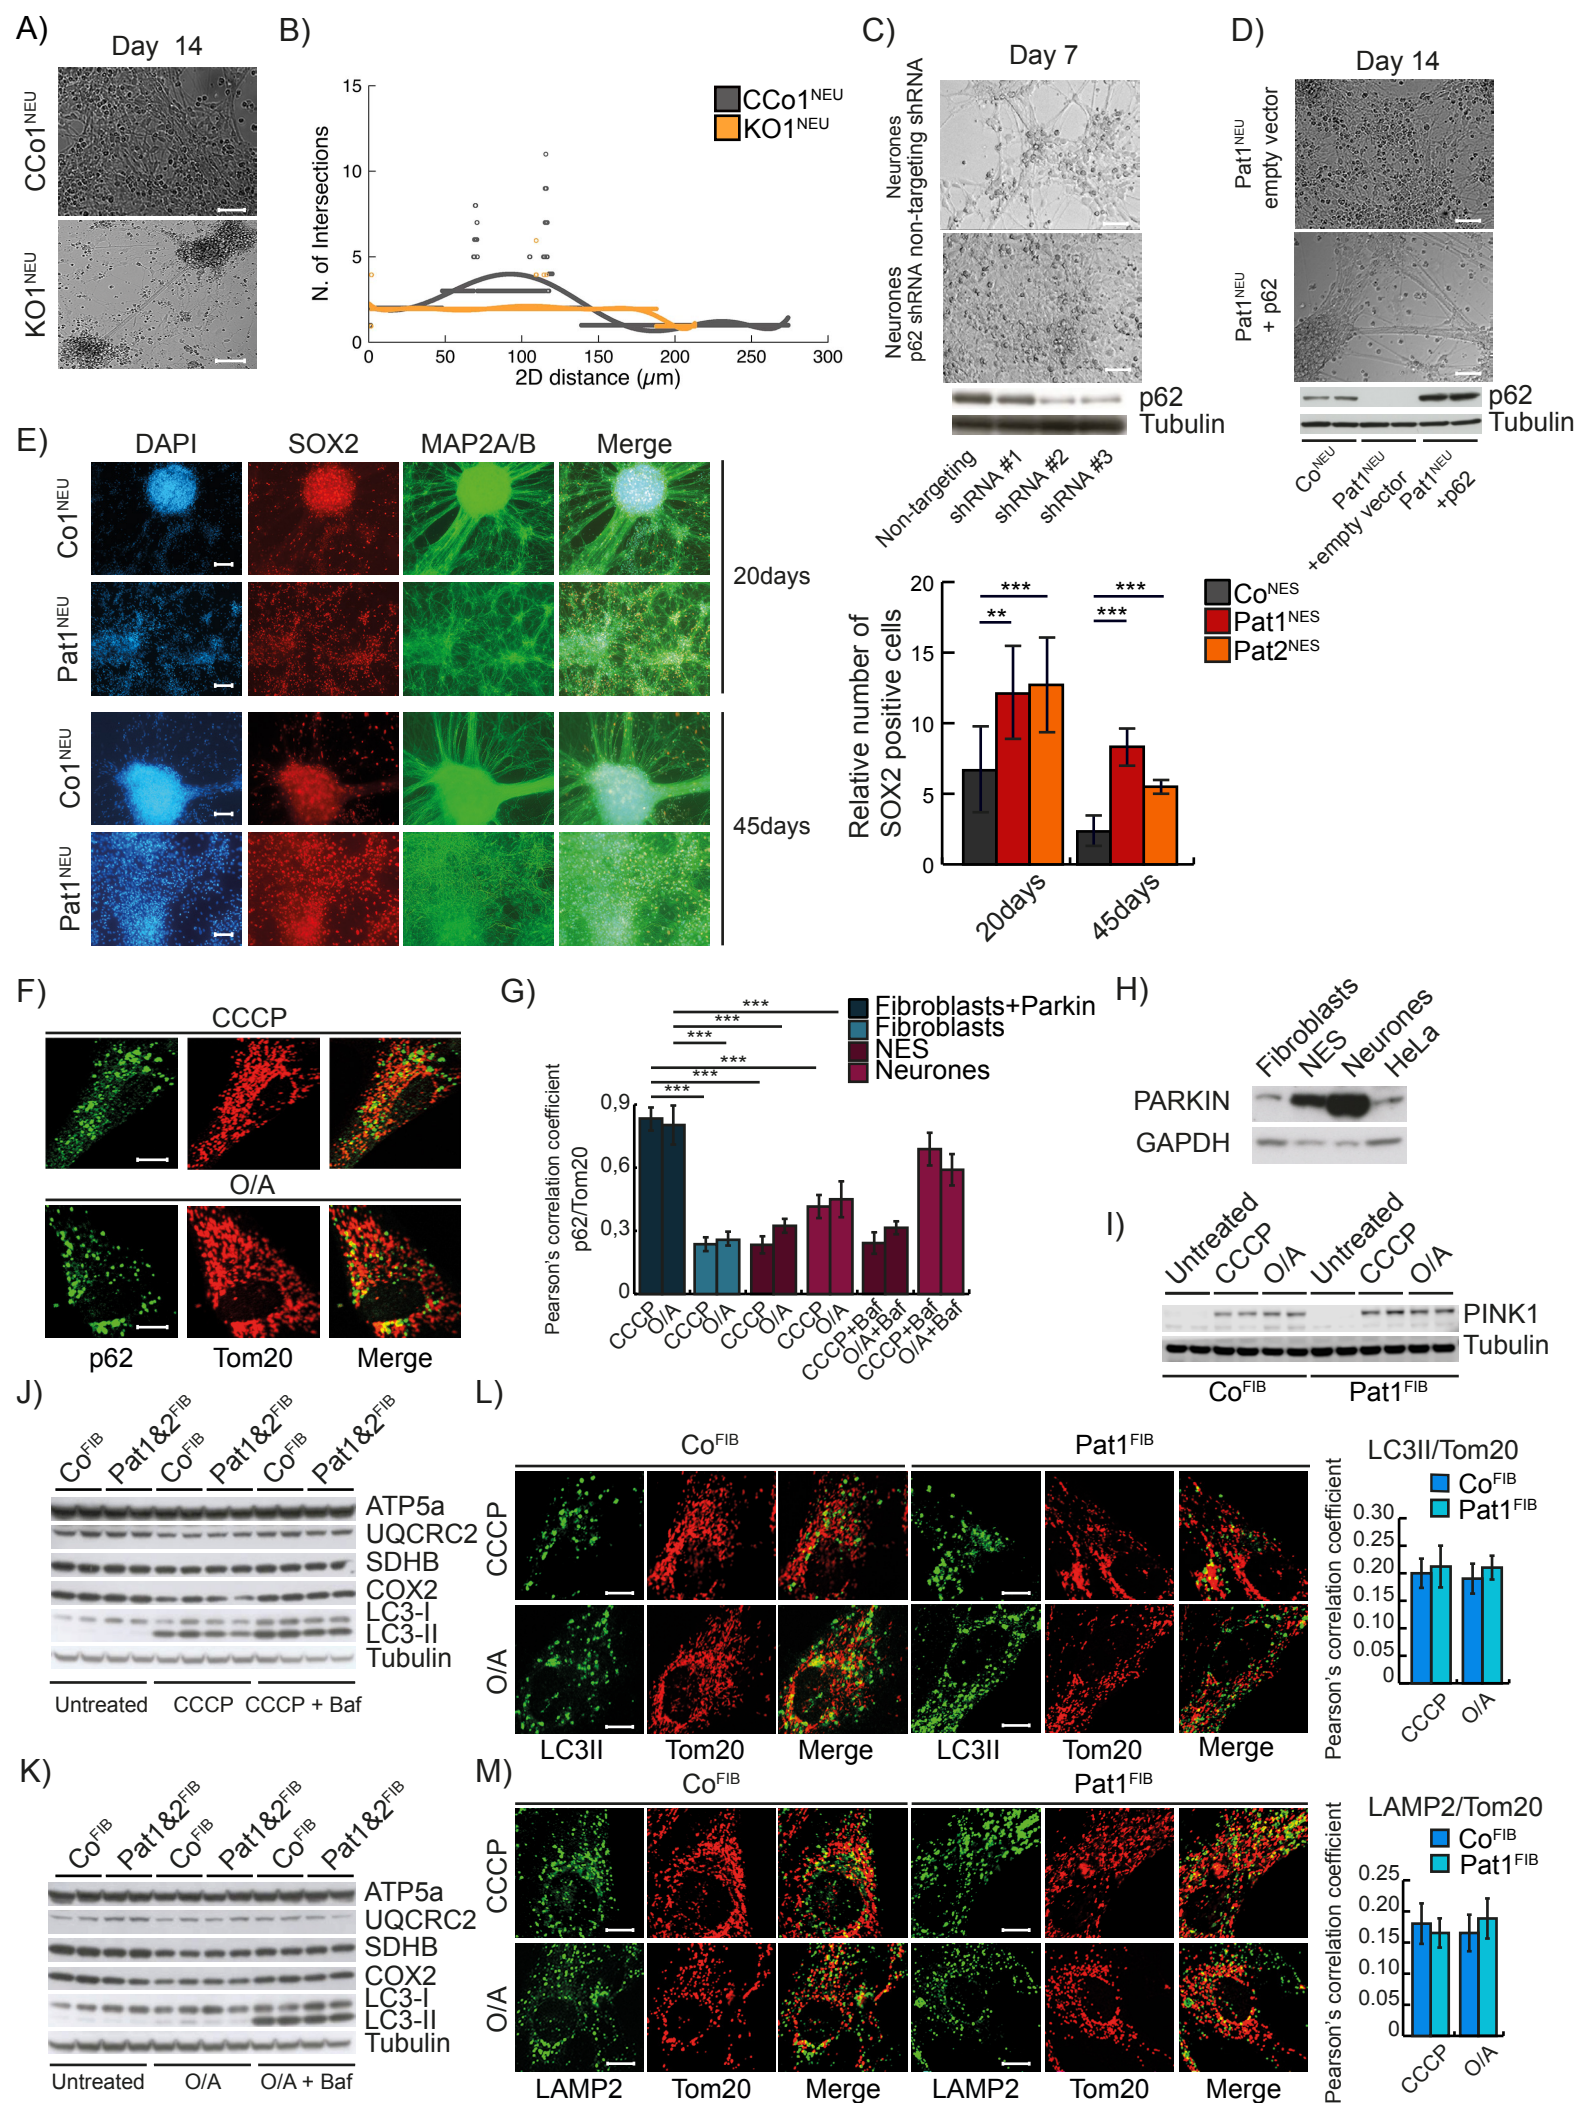

Figure S2

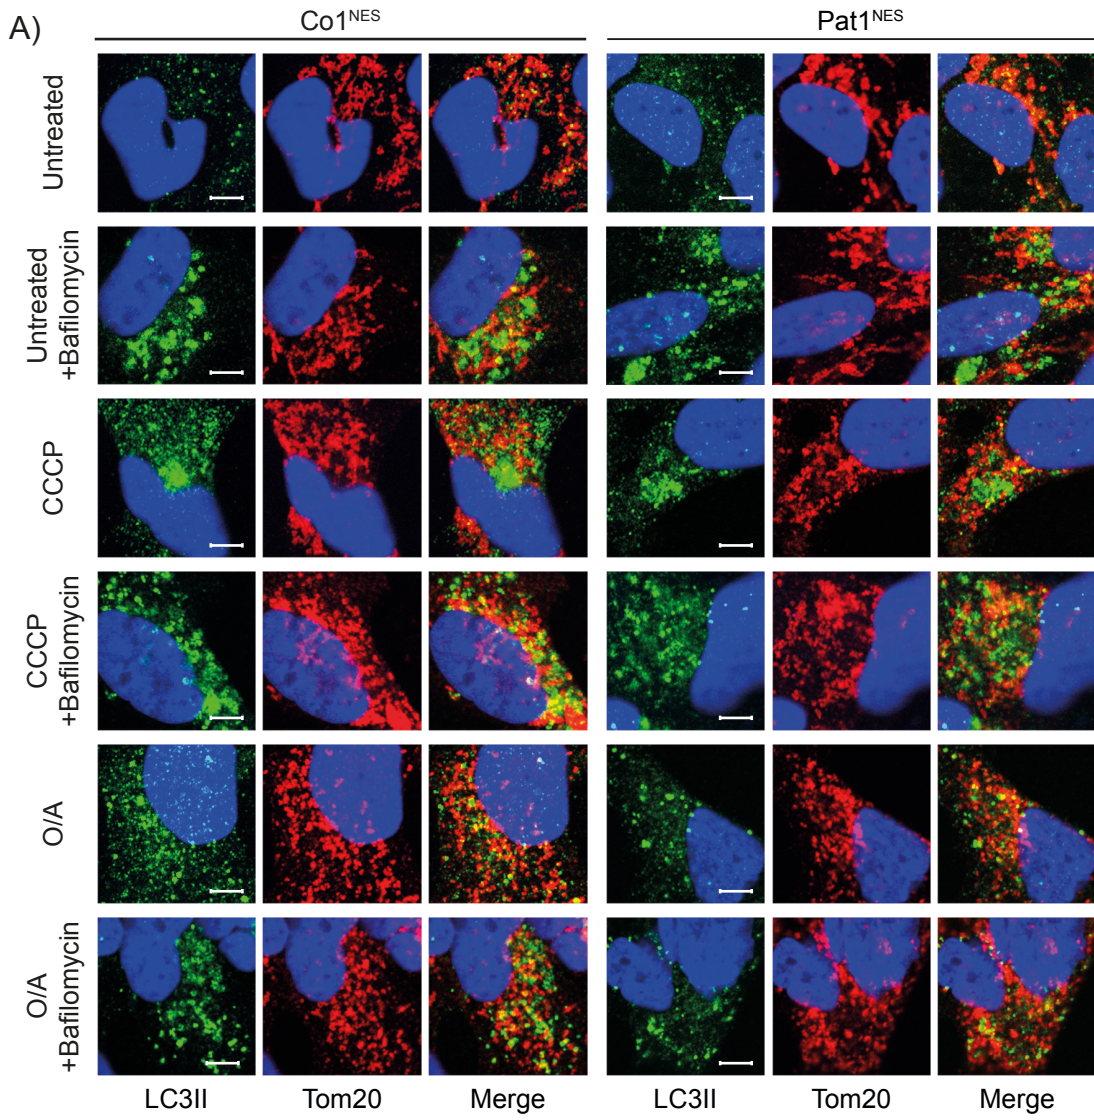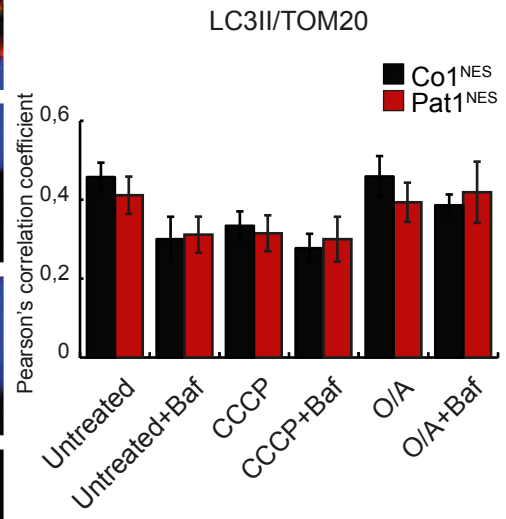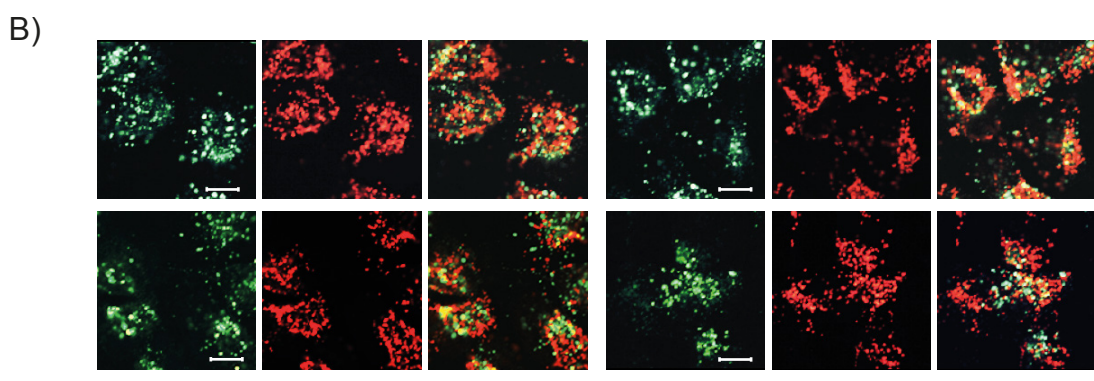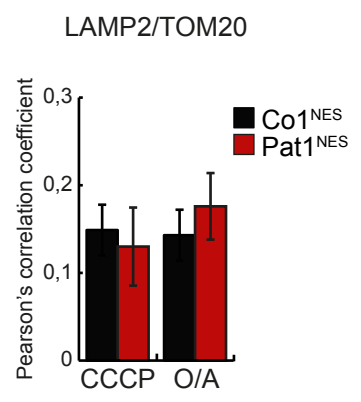

Figure S3

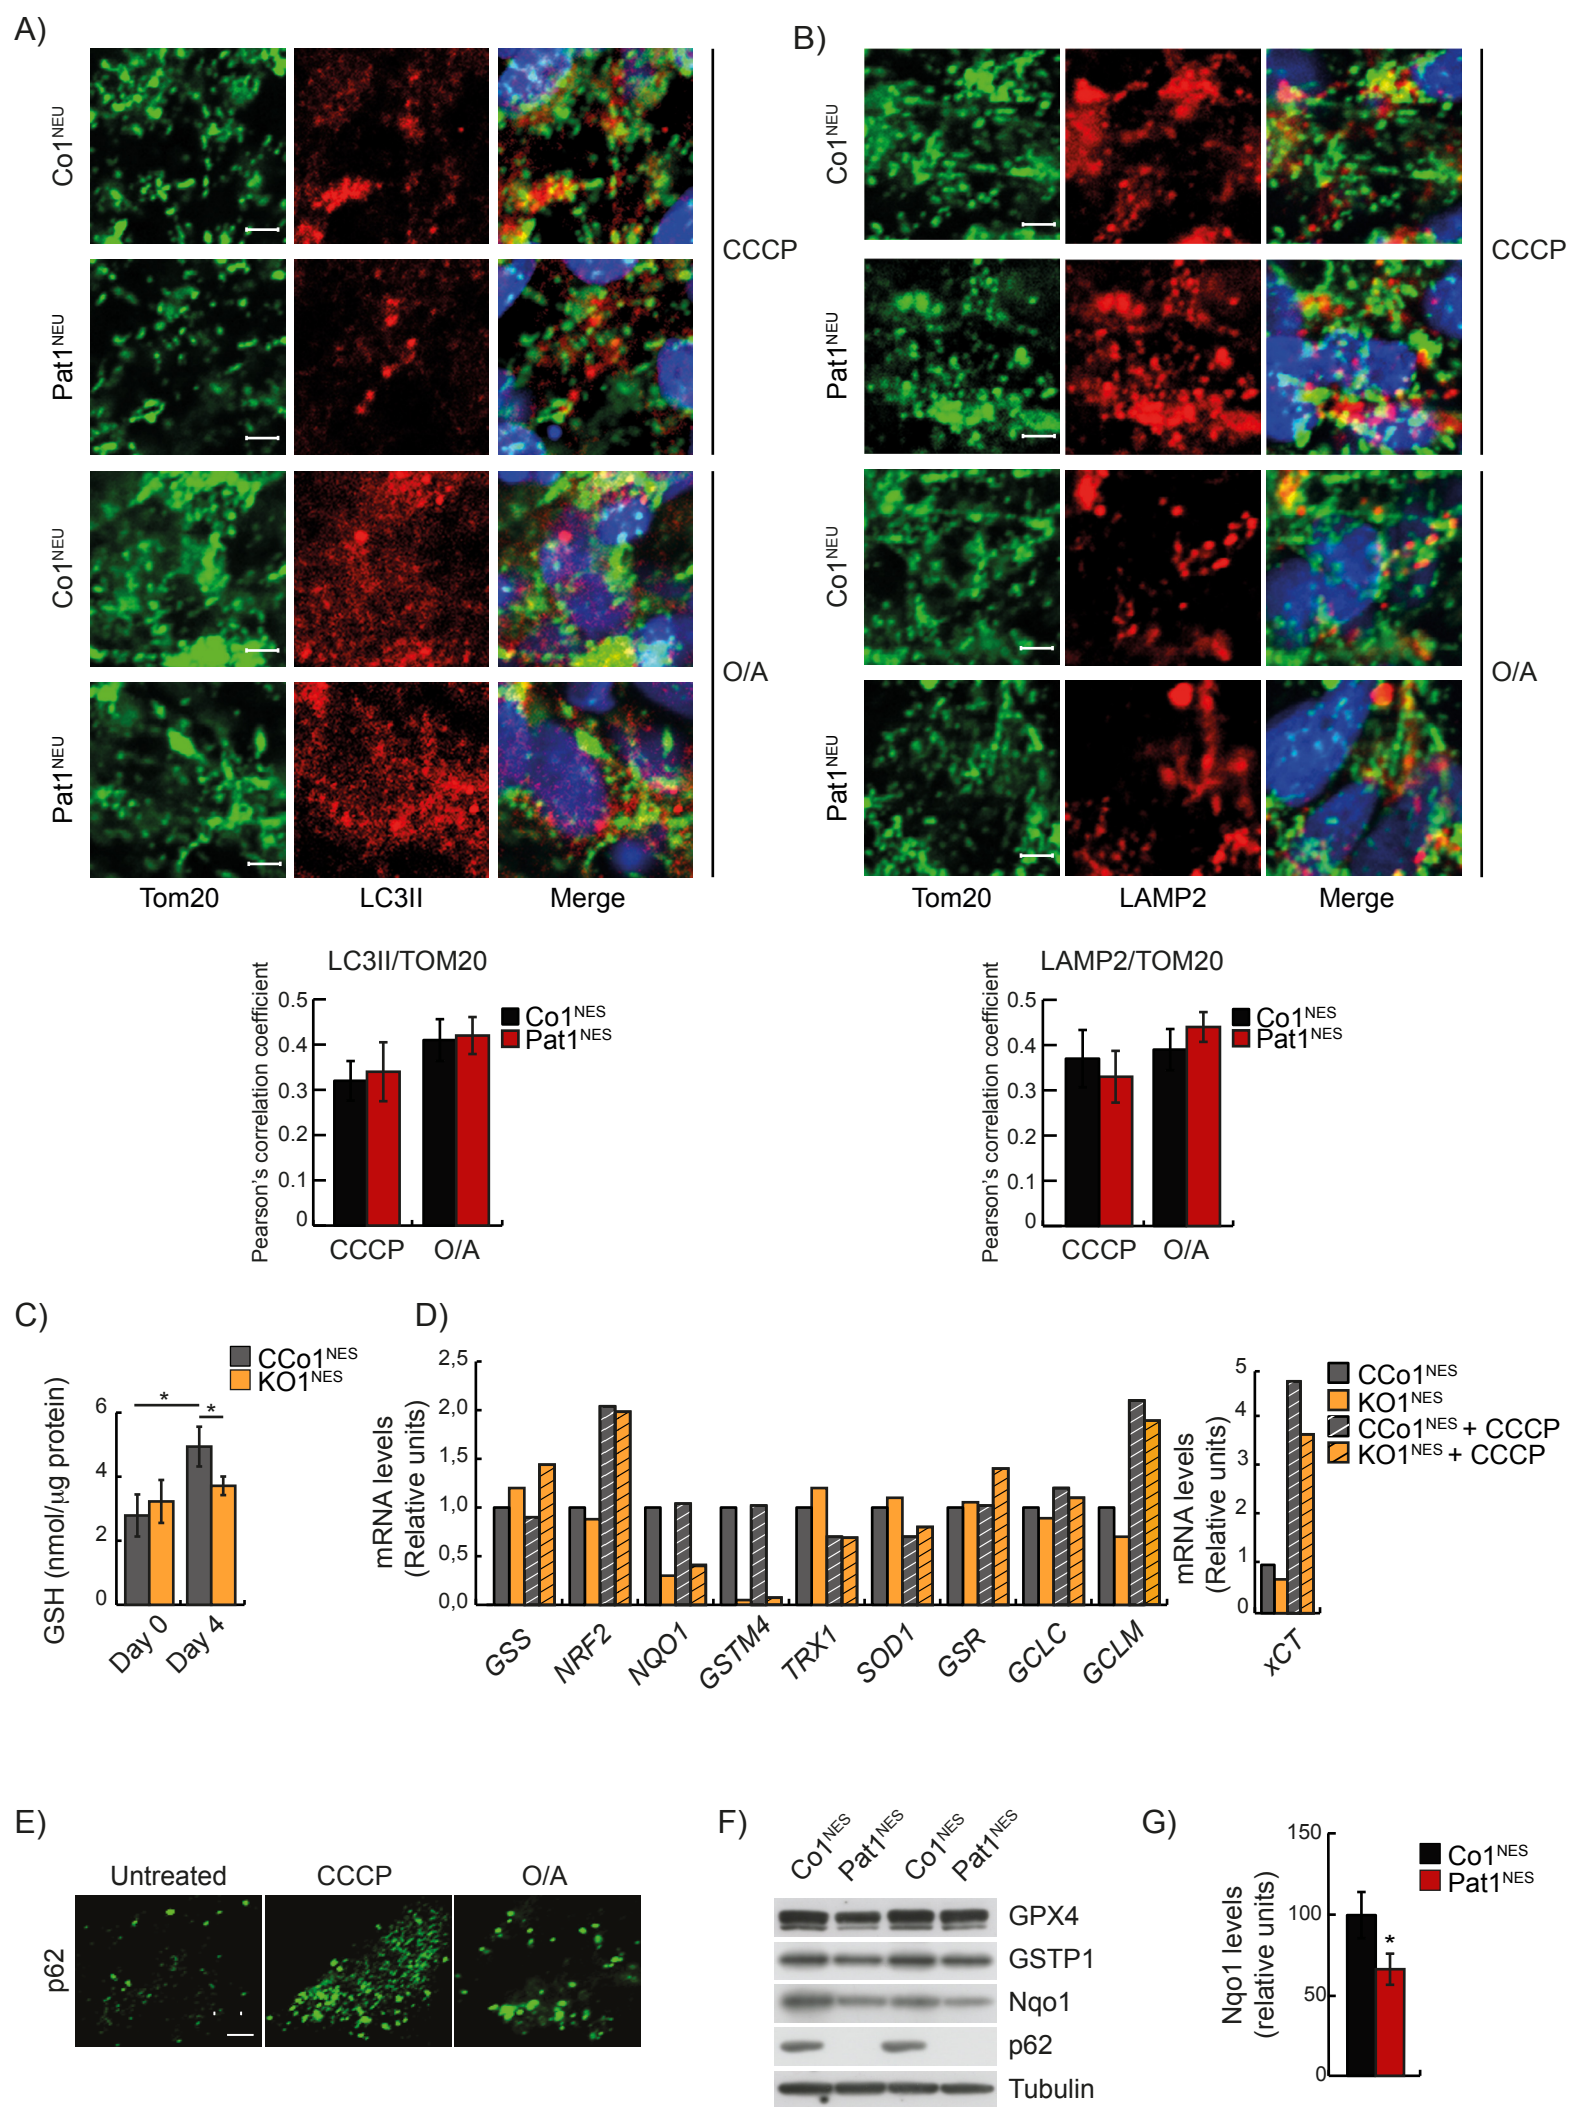

Figure S4

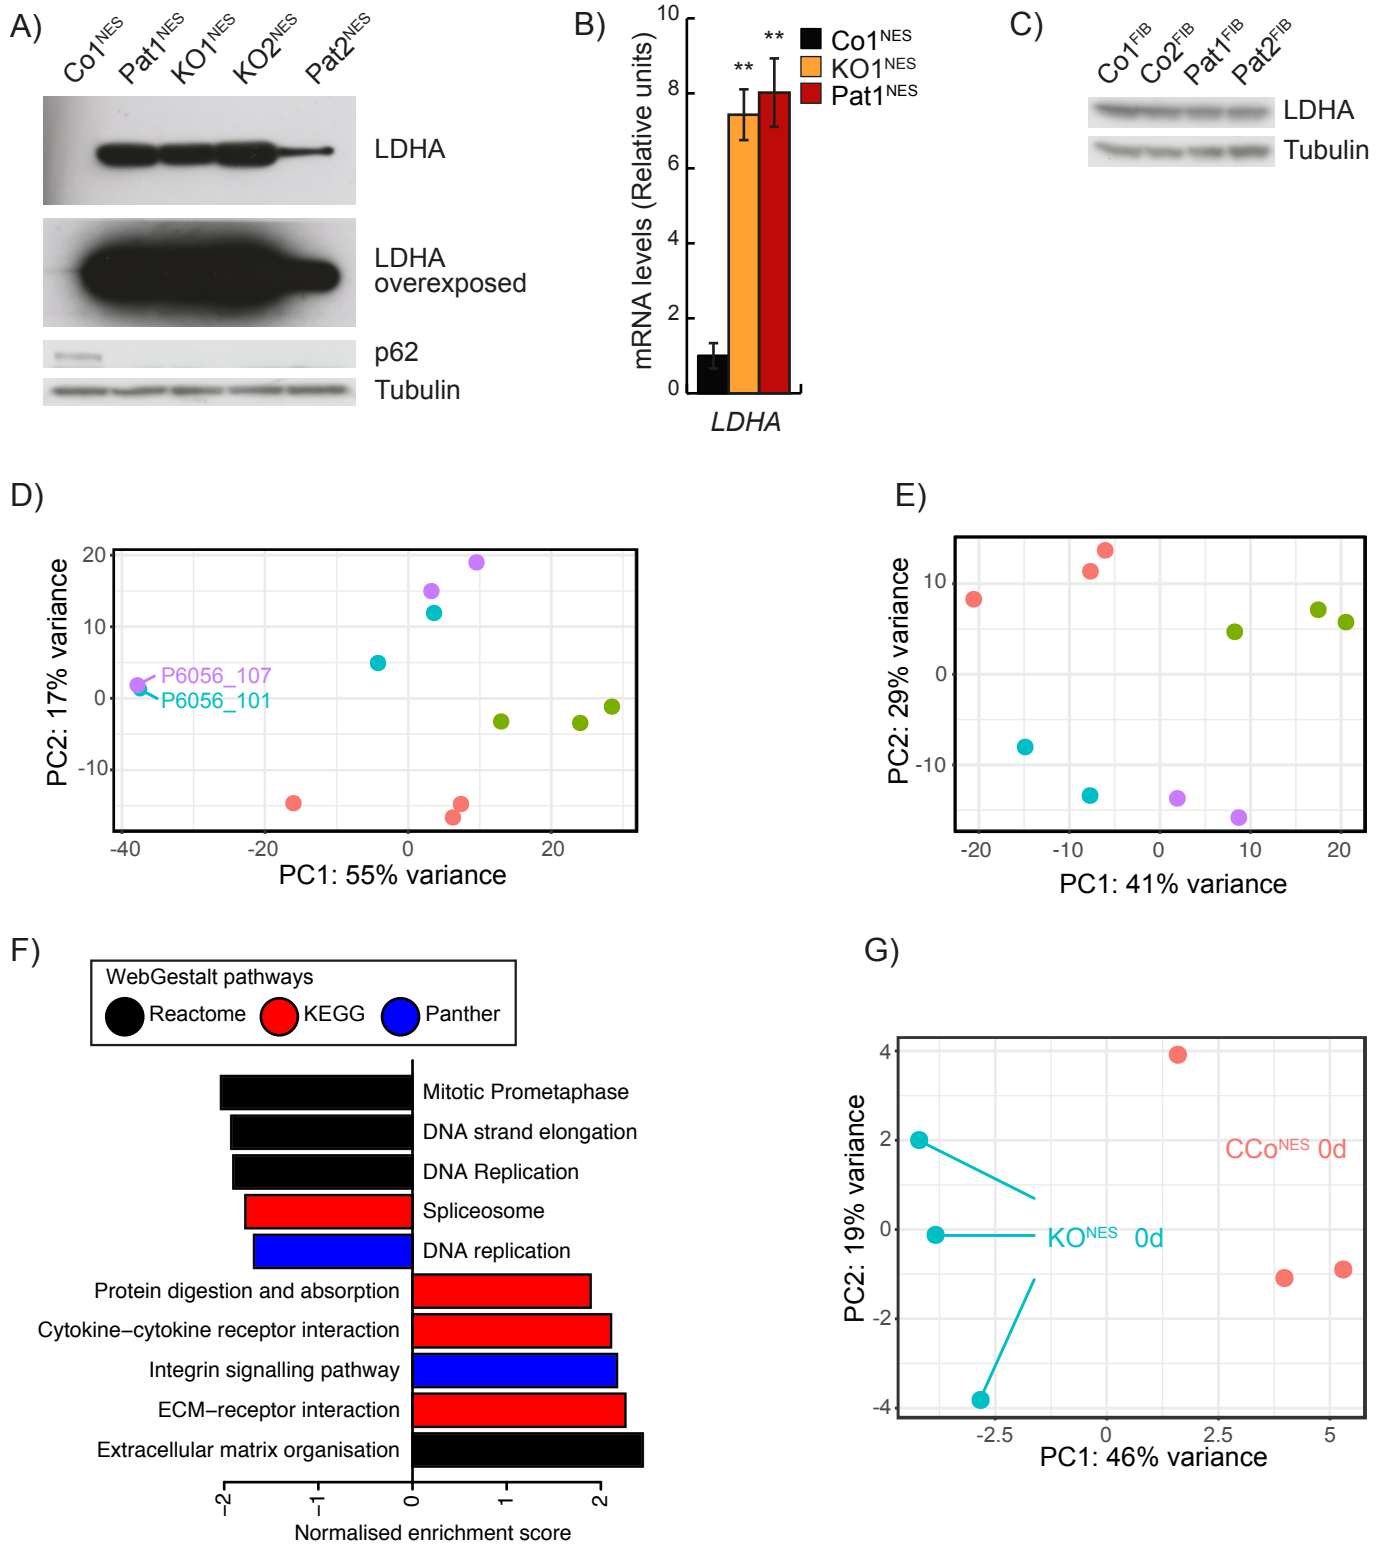

Figure S5

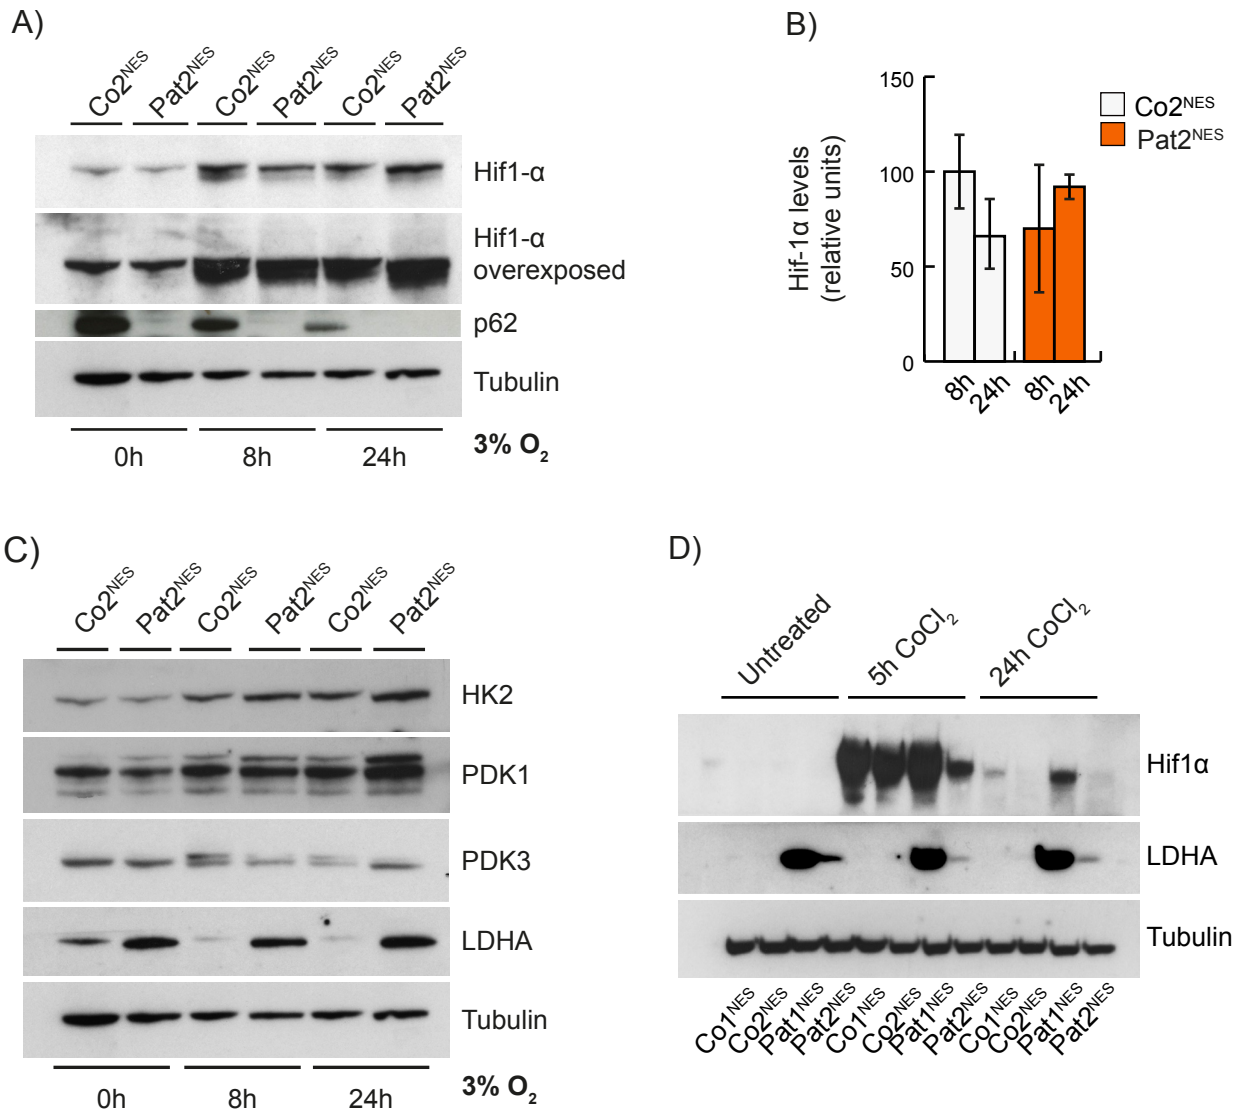

Figure S6

## SUPPLEMENTARY FIGURES LEGENDS

### Figure S1. Characterisation of NES cells. Related to figure 1.

(A) Representative fluorescence images of Co1<sup>NES</sup>, Pat1<sup>NES</sup> immunostained against stem cell markers Nestin, SOX2, PLZF and DACH1. Scale bar: 20  $\mu$ m. (B) Representative western blot analysis of Nestin, SOX2, PLZF and DACH1 in Co1<sup>NES</sup> and Pat1<sup>NES</sup> cells. Tubulin was used as a loading control. For (A-B) n=3 independent experiments. (C) qRT-PCR analysis of p62 transcript levels in Co1<sup>NES</sup> (grey), Pat1<sup>NES</sup> (red), Pat2<sup>NES</sup> (orange), KO1<sup>NES</sup> (dark yellow) and KO2<sup>NES</sup> (light yellow) cells. Data are expressed as mean  $\pm$  standard deviation (SD) and differences were tested by a two-tailed t-test. \*\* p < 0.01 and \*\*\* p < 0.001, n=3 independent experiments.

Figure S2. Characterisation of neuronal differentiation. Related to figure 1. (D) Representative fluorescence images of Co1<sup>NEU</sup>, Co2<sup>NEU</sup>, Co3<sup>NEU</sup>, Pat1<sup>NEU</sup> and Pat2<sup>NEU</sup>, immunostained against stem cell marker SOX2 and neuronal marker MAP2A/B at 20 days of differentiation. Scale bar: 100  $\mu$ m. (E) Representative fluorescence images of Co1<sup>NEU</sup>, Co2<sup>NEU</sup>, Co3<sup>NEU</sup>, Pat1<sup>NEU</sup> and Pat2<sup>NEU</sup> immunostained against neuronal cell markers HuC/D (red),  $\beta$ -III tubulin (green) at 20 days of differentiation. Scale bar: 100  $\mu$ m. (F) Representative fluorescence images of Co1<sup>NEU</sup>, Co2<sup>NEU</sup>, Co3<sup>NEU</sup>, Pat1<sup>NEU</sup> and Pat2<sup>NEU</sup> immunostained against neuronal cell markers MAP2A/B (red), Neurofilament (green) at 20 days of differentiation. Scale bar: 100  $\mu$ m. (G) Linear Sholl analysis representation of 20-days differentiated Co1<sup>NEU</sup>, Co2<sup>NEU</sup>, Co3<sup>NEU</sup>. n=3 independent experiments. Neuronal processes analysed from 25 neuronal bodies.

### Figure S2. Characterisation of neuronal differentiation and confocal analysis of mitophagy in fibroblasts. Related to figures 1 and 2.

(A) Representative bright field images of CCo1<sup>NEU</sup> and KO1<sup>NEU</sup> cells after 14 days of differentiation. (B) Linear Sholl analysis representation of 20-days differentiated CCo1<sup>NEU</sup> and KO1<sup>NEU</sup>. n=3 independent experiments. Neuronal processes analysed from 25 neuronal bodies per line. (C) Top: representative bright field images of NES cells transduced with non-targeting shRNAs or p62 shRNA #2 and subjected to 7 days of differentiation process. Bottom: western blot analysis of p62 in Co1<sup>NES</sup> transduced with non-targeting shRNAs and three different p62 shRNAs. (D) Top: representative bright field images of Pat1<sup>NES</sup> cells transduced with empty pBABE or a pBABE-p62 construct and subjected to 14 days of differentiation. Bottom: western blot analysis of p62 in Co1<sup>NES</sup> and Pat1<sup>NES</sup> cells transduced with empty pBABE or pBABE-p62. For C and D tubulin was used as a loading control. Scale bar: 100  $\mu$ m. n=3 independent experiments. (E) Left: representative fluorescence images of Co1<sup>NEU</sup> and Pat1<sup>NEU</sup>, immunostained against stem cell marker SOX2 (red) and neuronal marker MAP2A/B (green) at 20 and 45 days of differentiation. Scale bar: 100  $\mu$ m. Right: quantification of the relative number of SOX2 positive cells in Co1<sup>NEU</sup>, Co2<sup>NEU</sup>, Co3<sup>NEU</sup> (pooled as "Co<sup>NEU</sup>"), Pat1<sup>NEU</sup> and Pat2<sup>NEU</sup> cells after 20 and 45 days of differentiation. Data are expressed as mean  $\pm$  standard deviation (SD) and differences were tested by a two-tailed t-test. \*\* p < 0.01, \*\*\* p < 0.001. n=3 independent experiments. (F) Representative confocal images of Co<sup>FIB</sup> treated for 2h with CCCP (20  $\mu$ M) (top) or O/A (10  $\mu$ M / 1  $\mu$ M) (bottom). Fibroblasts are immunostained against Tom20 (red) and p62 (green). (G) Graphs represent the quantification of Pearson's correlation coefficient between p62 and Tom 20 in fibroblasts overexpressing Parkin, fibroblasts, NES cells and 14-days differentiated neurones. Cells were treated for 2h with CCCP (20  $\mu$ M for fibroblasts and 10  $\mu$ M for NES and neurones) or O/A (10  $\mu$ M / 1  $\mu$ M for fibroblasts and 5  $\mu$ M / 1  $\mu$ M for NES and neurones) and with 50 nM bafilomycin. Data are presented as mean  $\pm$  standard deviation (SD) and differences were tested by a two-tailed t-test. \*\*\* p < 0.001, n=3 independent experiments. 25 cells per experiment were analysed to calculate Pearson's correlation coefficient. (H) Representative western blot analysis of Parkin in fibroblasts, NES cells, 14-day differentiated neurones and HeLa cells. n=2 independent experiments. (I-K) Representative western blot analysis in Co<sup>FIB</sup>, Pat1<sup>FIB</sup> and Pat2<sup>FIB</sup> treated for 24h with CCCP (20  $\mu$ M) or O/A (10  $\mu$ M / 1  $\mu$ M) and for 2h with 50nM bafilomycin. Tubulin was used as a loading control. n=3 independent experiments. (L, M) Representative confocal images of Co<sup>FIB</sup> and Pat1<sup>FIB</sup> treated for 24h with CCCP (20  $\mu$ M) or O/A (10  $\mu$ M / 1  $\mu$ M) immunostained against LC3II (green) and Tom20 (red) in (L) or against LAMP2 (green) and Tom20 (red) in (M). Graphs represent the quantification of Pearson's correlation coefficient between the analyzed proteins. Data are presented as mean  $\pm$  standard deviation (SD) and differences were tested by a two-tailed t-test. n=3 independent experiments. 25 cells per experiment were analysed to calculate Pearson's correlation coefficient. Scale bars: F 20  $\mu$ m, L and M 5  $\mu$ m.

### Figure S3. Confocal analysis of mitophagy in NES cells. Related to figure 2.

(A) and (B) Left: representative confocal images of Co1<sup>NES</sup> and Pat1<sup>NES</sup> treated with CCCP (10  $\mu$ M) and O/A (10  $\mu$ M / 1  $\mu$ M) for 12 hours, with or without 50 nM bafilomycin. NES cells were immunostained against LC3II (green), Tom20 (red) and DAPI (blue) in (A) or LAMP2 (green), Tom20 (red) and DAPI (blue). Right: graphs representing the quantification of Pearson's correlation coefficient between the analyzed proteins. Data are presented as mean  $\pm$  standard deviation (SD). n=3 independent experiments. 25 cells per experiment were analysed to calculate Pearson's correlation coefficient. Scale bars: 20  $\mu$ m.



**Figure S4. Confocal analysis of mitophagy in neurons and differential antioxidant behaviour in NES cells lacking p62. Related to figures 2 and 3.**

(A) and (B) Representative confocal images of Co1<sup>NEU</sup> and Pat1<sup>NEU</sup> differentiated for 14 days and treated with CCCP (10  $\mu$ M) and O/A (10  $\mu$ M / 1  $\mu$ M) for 12 hours. Neurones were immunostained against LC3II (red), Tom20 (green) and DAPI (blue) in (A) or LAMP2 (red), Tom20 (green) and DAPI (blue). Right: graphs representing the quantification of Pearson's correlation coefficient between the analyzed proteins. Data are presented as mean  $\pm$  standard deviation (SD). n=3 independent experiments. 25 cells per experiment were analysed to calculate Pearson's correlation coefficient. Scale bars: 20  $\mu$ m. (C) Quantification of reduced glutathione levels in undifferentiated and 4 days differentiated CCo1<sup>NES</sup> (grey) and KO1<sup>NES</sup> (orange). Data are presented as mean  $\pm$  standard deviation (SD) and differences were tested by a two-tailed t-test. \* p < 0.05, n=3 independent experiments. (D) qRT-PCR analysis in untreated or treated with 10  $\mu$ M CCCP for 6 hours CCo1<sup>NES</sup> (grey) and KO1<sup>NES</sup> (orange). Beta-actin was used as endogenous control. n=2 independent experiments. (E) Representative confocal images of NES cells treated for 6 hours with 10  $\mu$ M CCCP or 5  $\mu$ M oligomycin and 1  $\mu$ M antimycin, followed by immunostaining against p62. n=3 independent experiments. Scale bar 10  $\mu$ m. (F) Representative western blot analysis of GPX4, GSTP1, NQO1 and p62 in Co1<sup>NES</sup> and Pat1<sup>NES</sup> cells. Tubulin was used as a loading control. n=3 independent experiments. (G) Quantification of NQO1 levels from (F). Data are presented as mean  $\pm$  standard deviation (SD) and differences were tested by a two-tailed t-test. \* p < 0.05, n=3 independent experiments.

**Figure S5. Western blot and qPCR analysis of LDHA in NES cells and fibroblasts and quality control of high-throughput data. Related to figure 4 and 5.**

(A) Representative western blot analysis of LDHA and p62 in Co1<sup>NES</sup>, Pat1<sup>NES</sup>, KO1<sup>NES</sup>, KO2<sup>NES</sup> cells and Pat2<sup>NES</sup>. Tubulin was used as a loading control. n=3 independent experiments. (B) qRT-PCR analysis of LDHA transcript levels in Co1<sup>NES</sup> (grey), KO1<sup>NES</sup> (dark yellow) and Pat1<sup>NES</sup> (red) cells. Beta-actin was used as endogenous control. Data are expressed as mean  $\pm$  standard deviation (SD) and differences were analysed by a two-tailed t-test. \*\* p < 0.01, n=3 independent experiments. (C) Representative western blot analysis of LDHA in two fibroblast control lines, Pat1<sup>FIB</sup> and Pat2<sup>FIB</sup>. Tubulin was used as a loading control. n=3 independent experiments. (D) Principal component analysis of undifferentiated (0d) and differentiated (4d) control CCo<sup>NES</sup> and KO<sup>NES</sup> transcriptomes. Two outlier samples are labeled P6056\_101 and P6056\_107. (E) Principal component analysis of undifferentiated (0d) and differentiated (4d) control CCo<sup>NES</sup> and KO<sup>NES</sup> transcriptomes, excluding the outlier samples identified in (A). (F) Gene Set Enrichment Analysis (GSEA) against pathways in WebGestalt of the outlier transcriptome samples identified in (A) compared to all other samples. (G) Principal component analysis of undifferentiated (0d) CCo<sup>NES</sup> and KO<sup>NES</sup> proteomes.

**Figure S6: Physiological oxygen concentration reveals a pro-glycolytic metabolism in the absence of p62. Related to figure 6.**

(A) Representative western blot analysis of Hif-1 $\alpha$  and p62 steady-state levels in Co2<sup>NES</sup> and Pat2<sup>NES</sup> cells, cultured for 0, 8 or 24h at 3% O<sub>2</sub>. Tubulin was used as a loading control. n=3 independent experiments. (B) Quantification of (A). Data are expressed as mean  $\pm$  standard deviation (SD). n=3 independent experiments. (C) Representative western Blot analysis of HK2, PDK1, PDK3 and LDHA as in (A). Tubulin was used as a loading control. n=3 independent experiments. (D) Representative western blot analysis of Hif-1 $\alpha$  and LDHA in Co1<sup>NES</sup>, Co2<sup>NES</sup>, Pat1<sup>NES</sup> and Pat2<sup>NES</sup> cultured for 0, 5 or 24h in the presence of 200  $\mu$ M CoCl<sub>2</sub>. Tubulin was used as loading control. n=5 independent experiments.

**Table S2. qPCR primer sequences.**

| Species | Gene (Forward/Reverse) | Sequence (5'-3')            |
|---------|------------------------|-----------------------------|
| Human   | GCLC forward           | TGTCTCCAGGTGACATTCCA        |
| Human   | GCLC reverse           | GCCTCGGTAAAAGGGAGATG        |
| Human   | GCLM forward           | CACAGCGAGGAGGAGTTTC         |
| Human   | GCLM reverse           | TGATTCTACAATGAACAGTTTTGCA   |
| Human   | GPX1 forward           | TTCCCGTGCAACCAGTTT          |
| Human   | GPX1 reverse           | AGGGAATTCAGAATCTCTTCGTT     |
| Human   | GPX4 forward           | TACGGACCCATGGAGGAG          |
| Human   | GPX4 reverse           | CCACACACTTGTGGAGCTAGAA      |
| Human   | GSR forward            | TTTACCCCGATGTATCACGC        |
| Human   | GSR reverse            | TTCATCACACCCAAGTCCCT        |
| Human   | GSS forward            | TCGTCTCTTTGACATCCACA        |
| Human   | GSS reverse            | TTCGATCTGTTTCAGGGCTG        |
| Human   | GST forward            | GCTACAGCCCTGACTTTGAG        |
| Human   | GST reverse            | AGGTGATCTTGTCTCCAACA        |
| Human   | GSTA1 forward          | GGTGACAGCGTTTAAACAAAGC      |
| Human   | GSTA1 reverse          | CCGTGCATTGAAGTAGTGGA        |
| Human   | GSTK1 forward          | TTTGGCTCTGACCGGATG          |
| Human   | GSTK1 reverse          | CACGGCTGGAGGTATAGGG         |
| Human   | GSTP1 forward          | TCCCTCATCTACACCAACTATGAG    |
| Human   | GSTP1 reverse          | GGTCTTGCCTCCCTGGTT          |
| Human   | LDHA forward           | AACATGGCAGCCTTTTCCTT        |
| Human   | LDHA reverse           | TAAGACGGCTTTCTCCCTCT        |
| Human   | Nqo1 forward           | CACTGGTGGCAGTGGCTC          |
| Human   | Nqo1 reverse           | CCAATGCTATATGTCAGTTGAGG     |
| Human   | Nrf2 forward           | GACGGTATGCAACAGGACA         |
| Human   | Nrf2 reverse           | TTGAGGGTATAGATGAGTAAAAATGAT |
| Human   | p62 forward            | TACGACTTGTGTAGCGTCTG        |
| Human   | p62 reverse            | CGTGTTTCACCTTCCGGAG         |
| Human   | SOD1 forward           | TGACAAAGATGGTGTGGCC         |
| Human   | SOD1 reverse           | TTCATTTCCACCTTTGCCCA        |
| Human   | Trx1 forward           | GTGGGCCTTGCAAATGATC         |
| Human   | Trx1 reverse           | GGCATGCATTTGACTTCACA        |
| Human   | xCT forward            | TTTGGAGCTTTGTCTTATGCTG      |
| Human   | xCT reverse            | GAGTTCCACCCAGACTCGTA        |

## **STAR METHODS**

### **CONTACT FOR DETAILS AND RESOURCE SHARING**

Further information and requests for resources and reagents should be directed at: Anna Wredenberg ([anna.wredenberg@ki.se](mailto:anna.wredenberg@ki.se)).

### **EXPERIMENTAL MODELS AND SUBJECTS DETAILS**

#### **Fibroblasts, HeLa and Phoenix-AMPHO cells**

Human primary skin fibroblasts (passage 4 to 12) were taken from patients II:1 (Pat1, female) at 30 years of age and II:4 (Pat2, male) 17 years of age at the time of biopsy. The patients were born healthy to consanguineous parents of Kurdish descent and have been previously described in family 4 of (Haack et al., 2016), HeLa cells and Phoenix-AMPHO (ATCC) cells (passage 4 to 10) were cultured at 37°C in a 5% CO<sub>2</sub> atmosphere in DMEM-Glutamax (Thermo Fisher Scientific) media containing 25 mM glucose, 10% FBS (Thermo Fisher Scientific) and 1 mM sodium pyruvate (Thermo Fisher Scientific). Experiments were performed with cells cultured to 80%–90% confluency. Medium was changed regularly and cells were passaged using trypsin (Thermo Fisher Scientific).

#### **Reprogramming of fibroblasts**

Fibroblasts were reprogrammed using integration free Sendai virus-vector-mediated reprogramming (CytoTune™-iPS 2.0 reprogramming kit, Thermo Fisher Scientific). Fibroblasts were seeded at a density of 2.5 X 10<sup>4</sup> cells/cm<sup>2</sup>. The following day the cells were transduced using the Sendai virus according to the manufacturer's protocol. Seven days after transduction the cells were passaged using Trypsin-EDTA (0.05%) (Thermo Fisher Scientific) to a laminin-521 (Biolamina) coated plate at a density of 1.9 x 10<sup>3</sup> cells/cm<sup>2</sup> in Essential 8™ medium (Thermo Fisher Scientific) containing 5 μM of Y27632 rho-kinase inhibitor (ROCKi) (Millipore). Emerging iPS cell colonies were manually picked for the first passage and then enzymatically passaged as single cells as described below.

#### **Human induced pluripotent stem (hiPS) cells**

hiPS cells were cultured on human recombinant Laminin-521 (Biolamina) in Essential 8™ medium (Thermo Fisher Scientific). The cells were enzymatically passaged as single cells, using TrypLE Select 1x (Thermo Fisher Scientific) and seeded in Essential 8™ medium (Thermo Fisher Scientific) containing 10 μM of Y27632 rho-kinase inhibitor (ROCKi) (Millipore).

#### **Neural induction of induced pluripotent stem cells**

The neural induction protocol is based on (Chambers et al., 2009). Approximately 3.8 x 10<sup>4</sup> hiPS cells/cm<sup>2</sup> were seeded in a well of a Laminin-521 coated tissue culture plate with 10 μM of ROCKi in Essential 8™ medium. The day after seeding medium was changed to 80% DMEM/F12+GlutaMax (Thermo Fisher Scientific) plus 20% Knockout serum replacement (KSOR) medium (Thermo Fisher Scientific), Non-essential Amino Acids (Thermo Fisher Scientific), 2-mercaptoethanol (Thermo Fisher Scientific), Penicillin-streptomycin (Thermo Fisher Scientific) with 10 nM of SB-431542 (StemCell Technologies), 500 ng/mL of Noggin (PeproTech) and 10 nM CHIR 99021 (StemCell Technologies). Medium was changed daily. SB421542 was omitted from the medium after 5 days of differentiation and KSOR medium was progressively replaced by adding increasing levels of N2B27 medium, containing, 50% DMEM/F12 GlutaMax, 50% Neurobasal (Thermo Fisher Scientific), 2-mercaptoethanol, N-2 Supplement (100X) 5 μl/ml (Thermo Fisher Scientific), B-27 Supplement (50X) 10 μl/ml

(Thermo Fisher Scientific) and Penicillin-streptomycin (25%, 50%, 75% and 100%). At the 12<sup>th</sup> day of differentiation the cells were passaged and introduced to NES culture conditioned conditions.

### **Neuroepithelial-like stem (NES) cells**

The generation of NES cells has previously been described (Falk et al., 2012; Koch et al., 2009). NES cells (passage 15 to 50) were cultured on 100 µg/ml poly-ornithine/ 2 µg/ml laminin2020-coated culture dishes (both (Sigma-Aldrich)), in DMEM/F-12 GlutaMax (Thermo Fisher Scientific) media containing 17 mM glucose, 100 units/ml penicillin-streptomycin (Thermo Fisher Scientific), N-2 Supplement (1:100) (Thermo Fisher Scientific), B-27 Supplement (1:1000) (Thermo Fisher Scientific), 10 ng/µl bFGF (Thermo Fisher Scientific) and 10 ng/µl EGF (Peprotech) at 37°C in a 5% CO<sub>2</sub> atmosphere. Three-fourths of the media was exchanged daily. Cells were trypsinised using TrypLE Express 1x (Thermo Fisher Scientific). Neuronal differentiation was induced by removing the growth factors bFGF and EGF from the medium and increasing the B-27 Supplement concentration to 1:100. The culture media was exchanged as described above. Control NES cell lines were derived from one male (Co1, C3 in (Wu et al., 2014)) and one female (Co2, AF22 in (Falk et al., 2012)) donors and have been previously described (Falk et al., 2012; Wu et al., 2014). A third control line was introduced (Co3), isolated from another female donor.

Hypoxia experiments were performed in a 3% oxygen concentration incubator for the indicated time periods.

### **Generation of p62 knockout NES cells by CRISPR/Cas9 gene editing**

The p62 locus of control NES cells (Co1) was targeted by CRISPR/Cas9 gene editing technology, as previously described (Cong et al., 2013). In short, pX335-U6-Chimeric\_BB-CBh-hSpCas9n (D10A) plasmids (pX335-U6-Chimeric\_BB-CBh-hSpCas9n(D10A) was a gift from Feng Zhang (Addgene plasmid # 42335)), with or without the p62 guide RNA sequence (targeting sequences are described in the key resource table), were nucleofected into control NES cells, using a 4D-Nucleofector™ System (Lonza). After nucleofection, cells were seeded in p35 dishes in conditioned NES cell media, at a 10 cell / well density. Following expansion, single clones were picked, using cloning cylinders (Sigma-Aldrich) and screened by Western blot analysis for the absence of p62 using SQSTM1/p62 antibodies (Cell Signaling Technology). Two CRISPR control (CCo1<sup>NES</sup> and CCo2<sup>NES</sup>) or p62-deficient (KO1<sup>NES</sup> and KO2<sup>NES</sup>) cell clones were used for further analysis.

## **METHOD DETAILS**

### **Retroviral production and NES cells transduction**

For overexpression experiments, p62 cDNA was cloned into pBABE-Puro. For silencing experiments, a p62 shRNA (Origene) or a non-targeting 29-mer scrambled shRNA cassette (Origene) were cloned in pGFP-V-RS. Overexpression and silencing of p62 in control NES and Pat1<sup>NES</sup> cells were performed by retroviral transduction of the corresponding plasmids.

For production of retrovirus, Phoenix-AMPHO cells (ATCC) were treated for 1h with 25 µM chloroquine (Sigma-Aldrich) and transfected using calcium chloride (Sigma-Aldrich) following manufacturer's instructions. After 7 hours fresh medium was added. Medium was harvested and filtered 24 hours and 48 hours after transfection. Retrovirus-containing medium was concentrated, using a Retro-X™ Concentrator (Clontech) following manufacturer's instructions and resuspended in 0.15% BSA. NES cells were transduced after addition of 5 µg/ml polybrene (Sigma-Aldrich).

## **Western Blotting**

Cells were harvested by trypsinisation and pellets were lysed using RIPA buffer (150 mM NaCl, 1% Triton x-100, 1% Sodium deoxycholate, 0.1% SDS, 1 mM EDTA and 50 mM Tris-HCl pH 7.4) followed by sonication. Whole-cell protein extracts were separated using Novex NuPAGE SDS-PAGE gel system (Thermo Fisher Scientific) and transferred to polyvinylidene difluoride membranes (Millipore), using 25 mM Tris, 192 mM glycine, pH 8.3 and 20% methanol. Membranes were blocked with 5% skim milk in TBS-T (25 mM Tris, 140 mM NaCl, 1% Tween 20, pH 7.4). Primary antibodies were incubated for at least 15h at 4°C. Primary antibodies used were: SQSTM1/p62 (Cell Signaling Technology, 5114S), Tom20 (Santa Cruz Biotechnology, SC-17764), LC3II (Cell Signaling Technology, 3868S, Sigma-Aldrich, L8918), PARKIN (Abcam, ab15954), KEAP1 (Cell Signaling, 4678S), GAPDH (Santa Cruz Biotechnology, SC-20357), Hif-1 $\alpha$  (Cell Signaling Technology, 14179S),  $\alpha$ -Tubulin (Sigma-Aldrich, T6199), PINK1 (Cell Signaling Technology, 6946), LDHA (Cell Signaling Technology, 2012), HK2 (Cell Signaling Technology, 2106), Phospho-p70 S6 Kinase (Thr389) (Cell Signaling Technology, 9234), p70 S6 Kinase Antibody (Cell Signaling Technology, 9202), c-Myc (Cell Signaling Technology, 5605), total OXPHOS Human Antibody Cocktail (Abcam, ab110411), MAP2A/B (Millipore, MAB3418), HuC/D (Thermo Fisher Scientific, A-21271), PDK1 (Cell Signaling Technology, 30625), PDK3 (Sigma-Aldrich, HPA046583), Nestin (R&D Systems, MAB1259), PLZF (Thermo Fisher Scientific, MA5-15667), DACH1 (ProteinTech, 10914-1-AP), NQO1 (Cell Signaling Technology, 622625), GPX4 (R&D Systems, MAB5457), GSTP1 (Cell Signaling Technology, 3369) and NRF2 (Abcam, ab31163). Membranes were washed and incubated for 2h at RT with the appropriate secondary antibody at a 1:4000 dilution. Secondary antibodies used in this study were: horseradish peroxidase-conjugated anti-rabbit (GE Healthcare, NA9340), anti-mouse (GE Healthcare, NA9310) or anti-goat (Santa Cruz Biotechnology, SC-2020). Western blots were visualised using Clarity Western ECL solution (Bio-Rad), following manufacturer's instructions.

## **RNA isolation, RT-PCR and quantitative PCR**

Total RNA was extracted using TRIzol (Thermo Fisher Scientific), followed by DNase-treatment using TURBO DNA-free kit (Thermo Fisher Scientific). 250 ng of RNA were reverse-transcribed using a High-capacity cDNA Reverse Transcription Kit (Applied Biosystems). Quantitative PCR analysis was performed using a Quant Studio 6 Flex instrument and Platinum SYBR Green qPCR supermix-UDG (Thermo Fisher Scientific). Gene expression was normalised to the house-keeping gene actin. Primers are listed in Table S2.

## **Detection of reactive oxygen species and measurement of glutathione levels**

NES cells or NES cells subjected to differentiation for 4 days were incubated at 37°C for 30 minutes with 1  $\mu$ M CM-H<sub>2</sub>DCFDA (Thermo Fisher Scientific). Images were taken using a Carl Zeiss fluorescence microscope. ImageJ software was used for signal intensity analysis.

Glutathione levels were measured in undifferentiated and 4-days differentiated NES cells, using the Glutathione assay kit (Sigma-Aldrich) following manufacturer's instructions.

## **Immunocytochemistry, confocal microscopy and bright field microscopy**

For PARKIN overexpression experiments, fibroblasts were nucleofected using a YFP-PARKIN plasmid (YFP-PARKIN was a gift from Richard Youle (Addgene plasmid # 23955)). 46h later, the fibroblasts were treated with 20  $\mu$ M CCCP (Sigma-Aldrich) or 10  $\mu$ M oligomycin and 1  $\mu$ M antimycin and fixed 2h later using the following protocol.

Fibroblasts, NES cells or neurones were cultured on 1,5 mm cover-slips as described above and fixed for 20 min using 3% paraformaldehyde (VWR) at RT. Permeabilisation and blocking was performed using a combination of saponin 0,1% (Sigma-Aldrich), 1% BSA (Sigma-Aldrich) in PBS for 1 hour. Primary antibodies TOM20 (Santa Cruz Biotechnology, SC-17764), SQSTM1 (Santa Cruz Biotechnology, SC-28359), LAMP2 (Southern Biotech, 9840-01), LC3II (MBL International, M152-3), Beta-3 Tubulin (Sigma-Aldrich, T8578) MAP2A/B (Millipore, MAB3418), Neurofilament (Sigma-Aldrich, N4142), HuC/D (Thermo Fisher Scientific, A-21271), Nestin (R&D Systems, MAB1259), SOX2 (Cell Signaling Technology, 3579S), PLZF (Thermo Fisher Scientific, MA5-15667) and DACH1 (ProteinTech, 10914-1-AP) were diluted in PBS with 1% BSA and incubated overnight. After washing, cells were incubated for 1h with secondary antibodies Alexa Fluor® 488 (Thermo Fisher Scientific, A-11017 (mouse) or A-11034 (rabbit)), Alexa Fluor® 568 (Thermo Fisher Scientific, A-11031 (mouse) or A-11036 (rabbit)) or Alexa Fluor® 633 (Thermo Fisher Scientific, A-21052 (mouse) or A-21071 (rabbit)) at a 1:1000 dilution. Cells were mounted with ProLong® Diamond Antifade Mountant (Thermo Fisher Scientific) and 0.01 µg/ml DAPI (Sigma-Aldrich, D9542), where appropriate. A Nikon Ti-E inverted point scanning confocal microscope A1R Si was used for image acquisition. A Carl Zeiss bright field microscopy was used for neuronal image acquisition during differentiation experiments. ImageJ software was used for image quantification.

### **Cell viability test**

MTT (3-(4,5-dimethylthiazol-2-yl)-2,5-diphenyltetrazolium bromide, Sigma-Aldrich) assays were used to monitor cell growth in the presence or absence of CCCP and NAC. Briefly, NES cells were treated for 15h with 10 µM CCCP and/or 1 mM NAC, followed by 90 min incubation in 300 µg/ml of MTT in phenol-free DMEM-Glutamax (Thermo Fisher Scientific) at 37°C. Cells were incubated for 10 min in 400 µl of DMSO (Sigma-Aldrich). 100 µl aliquots were used to measure emission at 570 nm and 630 nm, using a Infinite200 PRO multimode reader (TECAN).

### **Mitophagy assays**

Fibroblasts were treated for 24 hours with 20 µM CCCP (Sigma-Aldrich), 10 µM oligomycin and 1 µM antimycin or 50 nM bafilomycin (Sigma-Aldrich). NES cells or neurones differentiated for 14 days were treated for 12 hours with 10 µM CCCP (Sigma-Aldrich) or 10 µM oligomycin and 1 µM antimycin. Cells were immunostained followed by confocal visualisation or harvested for Western blot and qRT-PCR analysis.

### **Mitochondrial function analysis**

Mitochondrial respiratory chain enzyme activities were determined as previously described (Wibom et al., 2002). Mitochondrial oxygen consumption measurements of NES cells were performed on intact cells, using an Oroboros oxygraph (Oroboros Instruments GmbH). Maximal respiration was measured by titration of mitochondrial uncoupler CCCP or 2,4-Dinitrophenol (DNP).

### **RNAseq analysis**

Total RNA from CCo1&2<sup>NES</sup> and KO1&2<sup>NES</sup> clones at 0 or 4 days differentiation was obtained as previously described. RNA quality was confirmed using a Bioanalyser 2100 (Agilent). Samples with a minimum RNA integrity number (RIN) of 8.5 were used. Sequencing was performed using Illumina HiSeq 2500, High Output V4 chemistry, PE (paired-end) 2x125bp in 1 lane. The library method used was Illumina TruSeq Stranded mRNA, Poly-A selection (200 ng used for each library). Sequencing was performed by the SciLife Laboratory NGI core facility (Science for Laboratories, Stockholm, Sweden). The reads were mapped using Tophat2 (Kim et al., 2013)

to the human reference assembly, version GRCh38. Principal component analysis of the transcriptomic data from all samples showed that KO3<sup>NES</sup> did not cluster with its corresponding genetic matches both in the undifferentiated and differentiated state (Figure S5D and E). This clone showed poor growth in culture, and further inspection revealed that DNA replication pathways were repressed (Figure S5F). We removed this clone from all analysis, as it probably was compromised during CRISPR/Cas9 gene editing and/or expansion.

### **Proteomic analysis**

Proteomics analysis was performed on control NES cells, KO1&2<sup>NES</sup>, CCo1&2<sup>NES</sup> as well as Pat1<sup>NES</sup> cells. Samples were lysed by the addition of ProteaseMax/Urea and sonicated. Peptides were separated on a homemade C18 column, 25 cm (Silica Tip 360 µm OD, 75 µm ID, New Objective, Woburn, MA, USA) with a 120 min gradient at a flow rate of 300 nl/min. The gradient went from 5-26% of buffer B (2% acetonitrile, 0.1% formic acid) in 120 min and up to 95% of buffer B in 5 min and injected onto the LC-MS/MS system (Ultimate<sup>TM</sup> 3000 RSLCnano chromatography system and Q Exactive Plus Orbitrap mass spectrometer (Thermo Fisher Scientific). Proteomics analysis was performed by the Karolinska Institute proteomics core facility. Analysis of principal component one and two did not reveal outliers (Figure S5G), therefore all samples were included for further analysis.

### **Neuronal morphology analysis**

Neuronal body area and neuronal processes number and width emerging from neuronal bodies were measured using ZEN 2011 software. Images were acquired using Axio Imager2 fluorescence microscope from Carl Zeiss. For the number of neuronal processes, a minimum threshold of 10 µm width was introduced in order to clarify the morphological changes found.

### **Sholl analysis**

Sholl analysis was performed with Simple Neurite Tracer (Longair et al., 2011) and a semi-automated tool for Fiji (Schindelin et al., 2012) in control NES cells, Pat1<sup>NES</sup>, Pat2<sup>NES</sup>, CCo1<sup>NES</sup> and KO1<sup>NES</sup> cells after 3 weeks of differentiation.

## **QUANTIFICATION AND STATISTICAL ANALYSIS**

### **RNASeq and proteomics data analysis**

Data analysis was performed with R (v3.3.2) (R Core Team (2013)), the supplementary code for statistical analysis and figures is provided. Mapped RNAseq count files were cleaned by removing all genes with raw counts of less than 3 per one million counts. Mapped proteins were only included if its peptides were detected across all samples. Data were then normalised on the total amount of reads per sample and statistically analysed with DESeq 2 (v1.14.1) of the Bioconductor tools without log2-fold change shrinkage (betaPrior = FALSE) by applying a Wald-test (Love et al., 2014). Adjusted p-values were calculated applying individual hypothesis weighting (Ignatiadis et al., 2016). Gene set enrichment analysis (GSEA) was performed on the Broad Institute GSEA Java platform against libraries (Subramanian et al., 2005), Hallmarks, KEGG, Biocarta, Reactome, all v5.2, which were also used to extract genes associated to OXPHOS-related pathways. Discrepancies of normalised enrichment scores between proteomic and transcriptomic GSEA data could be explained by the much larger sequencing depth of RNAseq (>13,237 accepted hits) compared to mass spectrometry (3058 accepted hits). Ontologies were identified

with WebGestalt (Wang et al., 2013). Human Gene Atlas comparisons were done in EnrichR (Kuleshov et al., 2016).

All parameters in our study were distributed normally. Experiments were performed at least three times when statistical tests applied. Data are expressed as mean  $\pm$  standard deviation (SD) and differences were tested by a two-tailed t-test. The values  $P < 0.05$  were considered statistically significant. Other types of analysis are indicated in the text. For confirmation of RNAseq or proteomics analysis experiments were repeated twice.

#### **DATA AVAILABILITY**

RNAseq raw data files and processed data are publicly available at GEO: GSE99559.

Proteomics raw data files and processed data are publicly available at PRIDE: PXD006647.

#### **REFERENCES**

- Chambers, S.M., Fasano, C.A., Papapetrou, E.P., Tomishima, M., Sadelain, M., Studer, L., 2009. Highly efficient neural conversion of human ES and iPS cells by dual inhibition of SMAD signaling. *Nat Biotechnol* 27, 275–280. doi:10.1038/nbt.1529
- Cong, L., Ran, F.A., Cox, D., Lin, S., Barretto, R., Habib, N., Hsu, P.D., Wu, X., Jiang, W., Marraffini, L.A., Zhang, F., 2013. Multiplex genome engineering using CRISPR/Cas systems. *Science* 339, 819–823. doi:10.1126/science.1231143
- Falk, A., Koch, P., Kesavan, J., Takashima, Y., Ladewig, J., Alexander, M., Wiskow, O., Taylor, J., Trotter, M., Pollard, S., Smith, A., Brüstle, O., 2012. Capture of neuroepithelial-like stem cells from pluripotent stem cells provides a versatile system for in vitro production of human neurons. *PLoS ONE* 7, e29597. doi:10.1371/journal.pone.0029597
- Haack, T.B., Ignatius, E., Calvo-Garrido, J., Iuso, A., Isohanni, P., Maffezzini, C., Lönnqvist, T., Suomalainen, A., Gorza, M., Kremer, L.S., Graf, E., Hartig, M., Berutti, R., Paucar, M., Svenningsson, P., Stranneheim, H., Brandberg, G., Wedell, A., Kurian, M.A., Hayflick, S.A., Venco, P., Tiranti, V., Strom, T.M., Dichgans, M., Horváth, R., Holinski-Feder, E., Freyer, C., Meitinger, T., Prokisch, H., Senderek, J., Wredenberg, A., Carroll, C.J., Klopstock, T., 2016. Absence of the Autophagy Adaptor SQSTM1/p62 Causes Childhood-Onset Neurodegeneration with Ataxia, Dystonia, and Gaze Palsy. *Am. J. Hum. Genet.* 99, 735–743. doi:10.1016/j.ajhg.2016.06.026
- Ignatiadis, N., Klaus, B., Zaugg, J.B., Huber, W., 2016. Data-driven hypothesis weighting increases detection power in genome-scale multiple testing. *Nat Meth* 13, 577–580. doi:10.1038/nmeth.3885
- Kim, D., Pertea, G., Trapnell, C., Pimentel, H., Kelley, R., Salzberg, S.L., 2013. TopHat2: accurate alignment of transcriptomes in the presence of insertions, deletions and gene fusions. *Genome Biol* 14, R36. doi:10.1186/gb-2013-14-4-r36
- Koch, P., Opitz, T., Steinbeck, J.A., Ladewig, J., Bruestle, O., 2009. A rosette-type, self-renewing human ES cell-derived neural stem cell with potential for in vitro instruction and synaptic integration. *Proc. Natl. Acad. Sci. U.S.A.* 106, 3225–3230. doi:10.1073/pnas.0808387106
- Kuleshov, M.V., Jones, M.R., Rouillard, A.D., Fernandez, N.F., Duan, Q., Wang, Z., Koplev, S., Jenkins, S.L., Jagodnik, K.M., Lachmann, A., McDermott, M.G., Monteiro, C.D., Gundersen, G.W., Ma'ayan, A., 2016.



- Enrichr: a comprehensive gene set enrichment analysis web server 2016 update. *Nucleic Acids Res.* 44, W90–7. doi:10.1093/nar/gkw377
- Longair, M.H., Baker, D.A., Armstrong, J.D., 2011. Simple Neurite Tracer: open source software for reconstruction, visualization and analysis of neuronal processes. *Bioinformatics* 27, 2453–2454. doi:10.1093/bioinformatics/btr390
- Love, M.I., Huber, W., Anders, S., 2014. Moderated estimation of fold change and dispersion for RNA-seq data with DESeq2. *Genome Biol* 15, 550. doi:10.1186/s13059-014-0550-8
- Schindelin, J., Arganda-Carreras, I., Frise, E., Kaynig, V., Longair, M., Pietzsch, T., Preibisch, S., Rueden, C., Saalfeld, S., Schmid, B., Tinevez, J.-Y., White, D.J., Hartenstein, V., Eliceiri, K., Tomancak, P., Cardona, A., 2012. Fiji: an open-source platform for biological-image analysis. *Nat Meth* 9, 676–682. doi:10.1038/nmeth.2019
- Subramanian, A., Tamayo, P., Mootha, V.K., Mukherjee, S., Ebert, B.L., Gillette, M.A., Paulovich, A., Pomeroy, S.L., Golub, T.R., Lander, E.S., Mesirov, J.P., 2005. Gene set enrichment analysis: A knowledge-based approach for interpreting genome-wide expression profiles. *Proc. Natl. Acad. Sci. U.S.A.* 102, 15545–15550. doi:10.1073/pnas.0506580102
- Wang, J., Duncan, D., Shi, Z., Zhang, B., 2013. WEB-based GEne SeT AnaLysis Toolkit (WebGestalt): update 2013. *Nucleic Acids Res.* 41, W77–83. doi:10.1093/nar/gkt439
- Wibom, R., Hagenfeldt, L., Dobeln, von, U., 2002. Measurement of ATP production and respiratory chain enzyme activities in mitochondria isolated from small muscle biopsy samples. *Anal. Biochem.* 311, 139–151.
- Wu, S., Johansson, J., Damdimopoulou, P., Shahsavani, M., Falk, A., Hovatta, O., Rising, A., 2014. Spider silk for xeno-free long-term self-renewal and differentiation of human pluripotent stem cells. *Biomaterials* 35, 8496–8502. doi:10.1016/j.biomaterials.2014.06.039
